# Supplementary material for: Chemical speciation and partitioning of trace metals (Cd, Co, Cu, Ni, Pb) in the lower Athabasca river and its tributaries (Alberta, Canada)
Source: Royal Society of Chemistry journal article supplement (doi:10.1039/c1em10563a), 2011-01-01

Figure 1: pH, conductivity, DOC, SPM, phosphate and calcium concentrations in (•) early summer, (o) mid-summer and (▲) mid summer flood. The shaded area indicates near development sites.

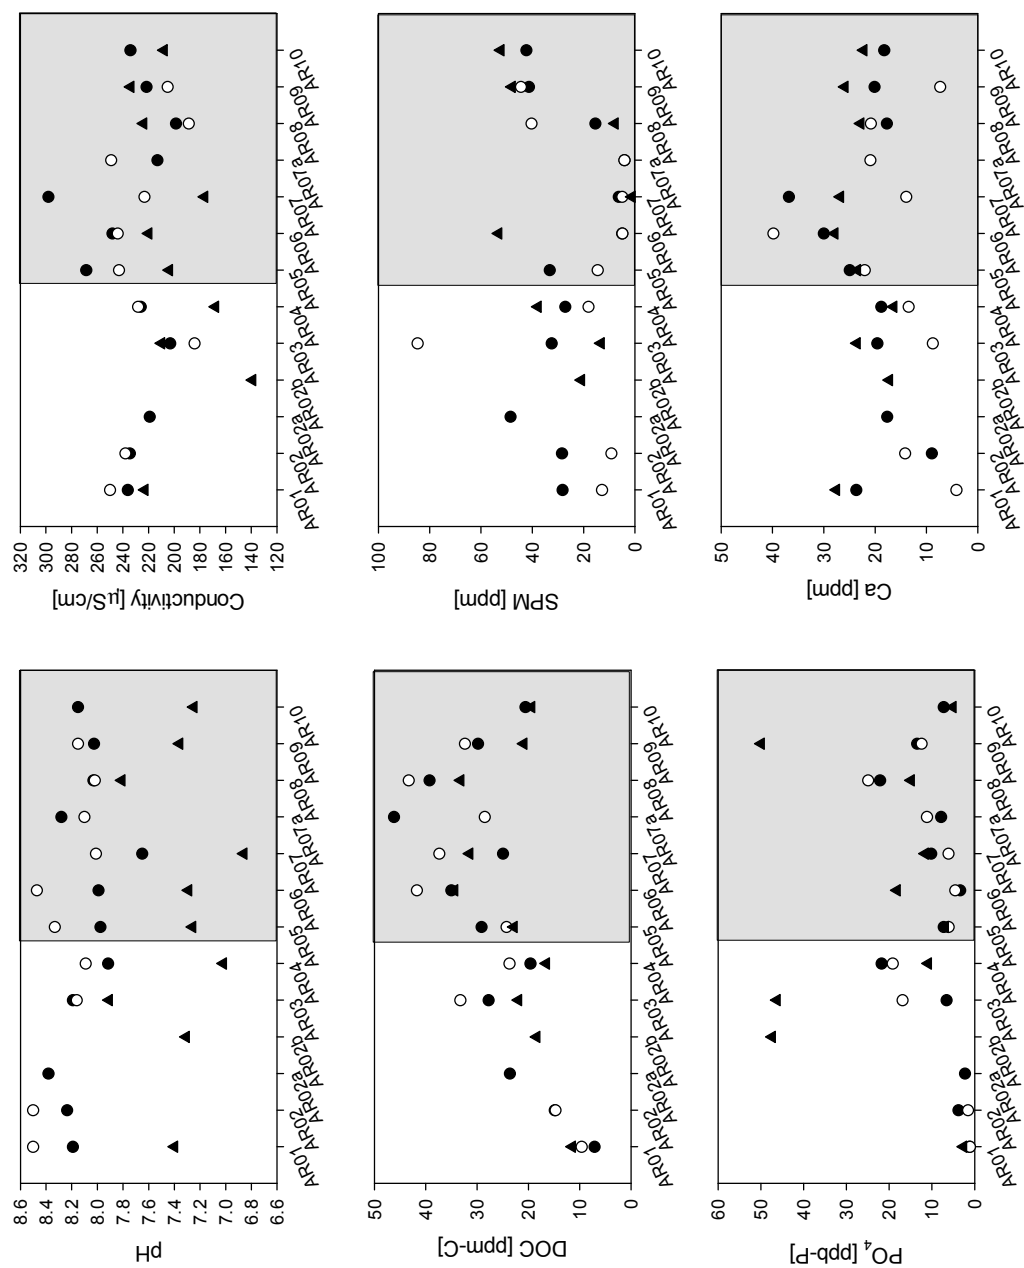

Supplement: c1em10563a.pdf [file c1em10563a.pdf]
